# Supplementary material for: Arrangement of Indocyanine Green in a 1.5-Nanometer Channel to Achieve High-Efficiency Imaging of the Intestinal Lymphatic System
Source: MDPI journal article supplement (doi:10.3390/molecules27248704), 2022-12-08
Supplement: s1 [file s1]

# Arrangement of Indocyanine Green in a 1.5-Nanometer Channel to Achieve High-Efficiency Imaging of the Intestinal Lymphatic System

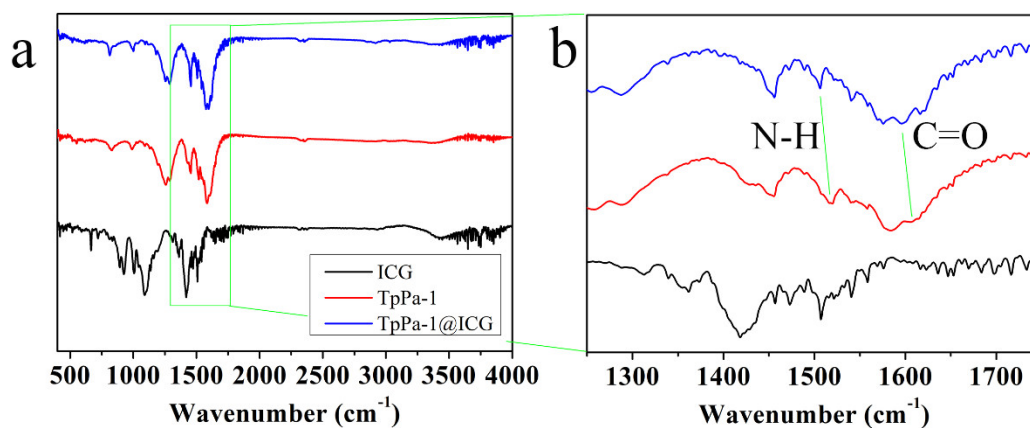

**Figure S1.** FT-IR spectra of ICG, TpPa-1, and TpPa-1@ICG (a) and the enlarged spectra (b).

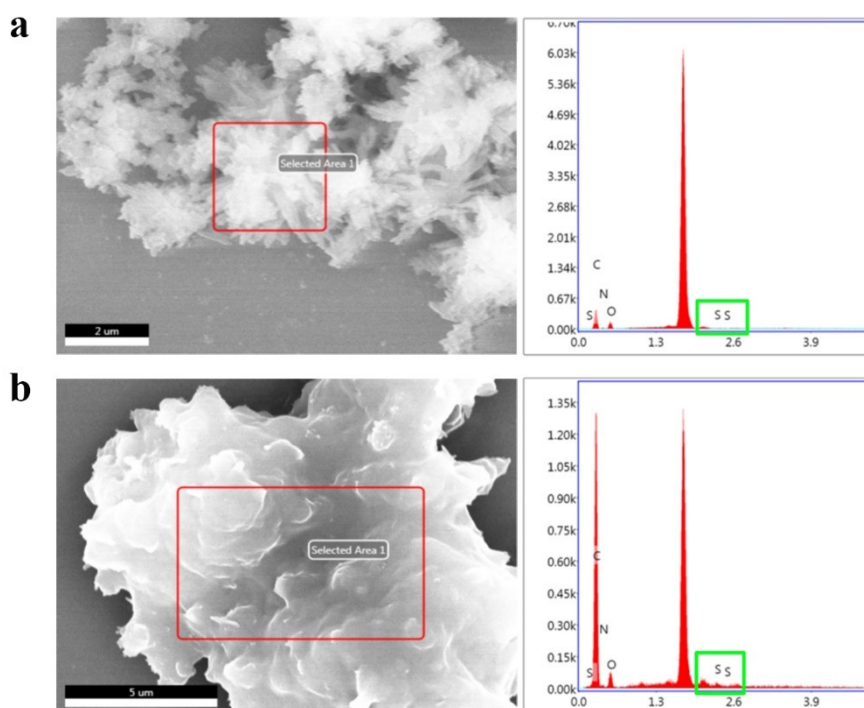

**Figure S2.** SEM images for TpPa-1 (a) and TpPa-1@ICG (b).

**Table S1.** CHN element analysis.

|            |              | C (%)  | N (%)  | S (%) |
|------------|--------------|--------|--------|-------|
| TpPa-1     | Theoretical  | 67.925 | 13.208 | ~     |
|            | Experimental | 65.566 | 14.551 | ~     |
| TpPa-1@ICG | Theoretical  | 65.642 | 13.142 | 1.054 |
|            | Experimental | 66.018 | 12.973 | 1.057 |

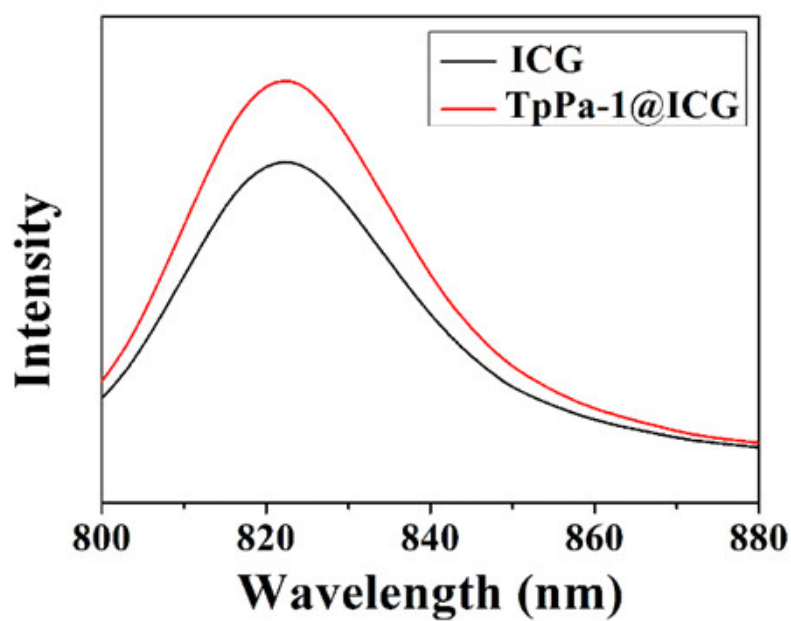**Figure S3.** Fluorescence emission spectra of ICG (black) and TpPa-1@ICG (red) dispersed in water ( $0.25 \text{ mg mL}^{-1}$ ).

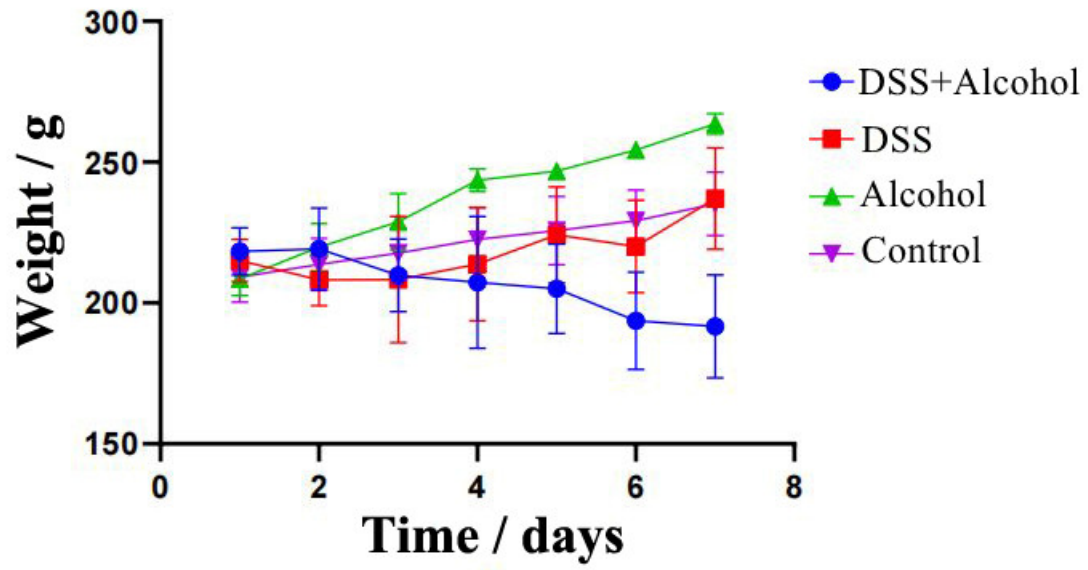

**Figure S4.** Change in body weight obtained from rat oral administration of DSS or alcohol. Control groups mean no administration.

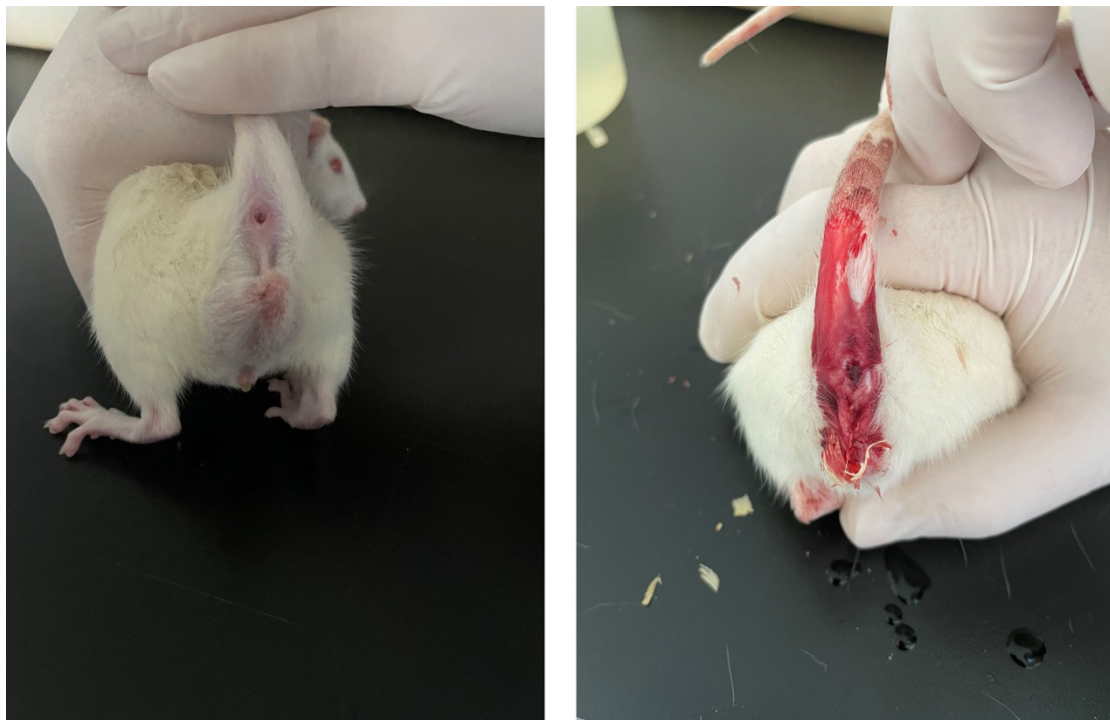

**Figure S5.** Hematochezia in rats after DSS and alcohol treatment. (left) control group; (right) DSS and alcohol treatment.
